# Supplementary material
Source: publisher figshare collection journal article supplement (https://aacr.figshare.com/articles/dataset/_/22441668)
Supplement: Supplementary file 1 [file 39892548]

## Supplemental Data

### A. Candidate urine markers screened out by perl program

| Unigene    | EST<br>from NT | EST from<br>Cancer | SAGE Tag   | SAGE NT<br>count | Reference<br>Sequence | U133Probe   | Final<br>Select |
|------------|----------------|--------------------|------------|------------------|-----------------------|-------------|-----------------|
| Hs. 351118 | 2              | 20                 | ACGCTATGTA | 1                | NM_206828             | 237461_at   | 1               |
| Hs. 515223 | 6              | 15                 | AAATGGACAA | 3                | AK092401              | 227919_at   | 1               |
| Hs. 167176 | 3              | 10                 | NA         | 0                | NM_01959              |             |                 |
| Hs. 495569 | 6              | 8                  | GGAGGCCTGC | 1                | BQ014236              |             |                 |
| Hs. 28700  | 10             | 7                  | AAGTCTGAA  | 1                | NM_012215             | 200899_s_at |                 |
| Hs. 568727 | 0              | 7                  | AGTCCACAC  | 1                |                       |             |                 |
| Hs. 466257 | 10             | 6                  | TGTCTGCTGC | 15               | NM_025245             | 230536_at   | 1               |
| Hs. 253320 | 10             | 5                  | GAGTACTTAG | 1                | NM_01830              |             |                 |
| Hs. 458395 | 8              | 5                  | AAGTGGAAAT | 3                |                       |             |                 |
| Hs. 153704 | 19             | 5                  | ACATCTTGCT | 14               | NM_002497             | 204641_at   |                 |
| Hs. 55304  | 2              | 4                  | AGATGATTGC | 1                |                       |             |                 |
| Hs. 199731 | 3              | 4                  | AATTCACCTT | 1                | NM_015717             | 220428_at   |                 |
| Hs. 551629 | 5              | 4                  | CATCAAGTGC | 1                |                       |             |                 |
| Hs. 520321 | 17             | 4                  | TCTGAAAGTC | 2                | NM_01859              |             |                 |
| Hs. 567758 | 4              | 4                  | GTAATTAATG | 2                |                       |             |                 |
| Hs. 362343 | 2              | 4                  | TTAATAGTAC | 6                | AK123745              | 239768_x_at | 1               |
| Hs. 281295 | 2              | 3                  | NA         | 0                |                       |             |                 |
| Hs. 2182   | 11             | 3                  | CTCAGATGTA | 1                | NM_017915             | 220060_s_at | 1               |
| Hs. 61995  | 0              | 3                  | TCTCAGAAGA | 1                |                       |             |                 |
| Hs. 447869 | 18             | 3                  | AAGGCCGTCA | 2                |                       |             |                 |
| Hs. 447969 | 13             | 3                  | TGTCATTGGA | 2                | NM_00282              |             |                 |
| Hs. 449194 | 4              | 3                  | CAGATGGAGC | 2                | NM_003290             | 209344_at   |                 |
| Hs. 285055 | 14             | 3                  | AAGATGTAA  | 3                |                       |             |                 |
| Hs. 307043 | 10             | 3                  | TGGTTATCTT | 6                | NM_152303             | 232214_x_at | 1               |
| Hs. 422466 | 3              | 3                  | CAGAGAATAA | 7                |                       |             |                 |
| Hs. 405614 | 17             | 3                  | CTGTCAGCGT | 11               | NM_138455             | 225681_at   |                 |
| Hs. 433586 | 3              | 3                  | TGAGGATACA | 11               | AK098294              | 242253_at   |                 |
| Hs. 307972 | 11             | 3                  | TCCTCAGGAC | 12               | NM_15267              |             |                 |

### B. Primers used in this research

| Primers        | Position (5' end)  | Sequences (5' to 3' )   |
|----------------|--------------------|-------------------------|
| Sense: U1      | DQ343132: 279      | GGGACTCCTTCGTGAGACC     |
| Anti-Sense: L1 | DQ343132: 859      | AGAGGAACGGATGAAGCCTG    |
| Sense: S-5     | Chr19(+): 15800389 | GAAGAAATGACCCAGGAGCTGAT |
| Sense: S-4     | Chr19(+): 15800601 | ATATGTCCAGGTGGCCTACAG   |

|                |                    |                          |
|----------------|--------------------|--------------------------|
| Sense: S-3     | Chr19(+): 15800664 | CAGCCAATTCCTGCCTTAACT    |
| Sense: S-2     | Chr19(+): 15800709 | ACCATTATGACGTGTTCTCTGC   |
| Sense: S-1     | Chr19(+): 15800757 | TGACATTCTTCTGGACAATGAGTC |
| Anti-sense: A1 | Chr19(+): 15807203 | GGCATATTAGCTTAAATGTAGGTG |

### C. Full length cDNA sequence of UCA1

>DQ343132

TGACATTCTTCTGGACAATGAGTCCCATCATCTCTCCACCATGCACCTTGTGACTCCCT  
CCTCTGCTGACAACAGATAACCACCTTTAACTGTAACCTTCCACAGCCTACCCCAGCCC  
TATAAAGCTGCCCTCTCCTATCTCCCTTCGCTGACTCTCTTTTCAGACTCAGCCCCTT  
GCACCCAAGTGAATTAACAGCCTTGTGCTCACACAAAGCCTGTTTAGGTGGTCTTCTA  
TACGGACATGCTTGACACTTGGTGCCAAAATCTGGGCCAGGGGGACTCCTTCGTGAGA  
CCGGCCCCCTGTCTGGCCCTCATTCCGTGAAGAGATCCACCTGCGACCTCGGGTCCT  
CAGACCAGCCCAAGGAACATCTACCAATTTCAAATCGGATCTCCTCGGCTTAGTGGC  
TGAAGACTGATGCTGCCCGATCGCCTCAGAAGCCCCTTGGACCATCACAGATGCCGAG  
CTTCGGGTAACCTTACGGTGGAGGATTCCCAGCCATATGAAGACACCCTAGCTGGAC  
GATCAGTCCTTGTCAAAAGTCTGACCCCTCAAACCTCTACAGCCTCAATGGACCAGACC  
CTACCCGGTCATTTATAGCACACCAACTGCCGTCCATCTGCAGGACCCTCTCCATTGGG  
TTCACCATTCCAGAATAAAGCCATGCCCATCAGACAGCCAGCTTGATCTCTCCTCTTCC  
TCCTGGAAGCCACAAGATTAGGCCGAGAGCCGATCAGACAAACAACCTACAACCCTTA  
AGCTCCTGGCAGCGCCAGCCAAGGCCATGCTTCCATGCAACACTCCTTCCAAATGGC  
CATCCCAGCATGCTTCCAAGCAGGCTTCATCCGTTCTCTGGACCCTCATCTCTTAAGA  
CCTGCCGCCTATAAAAAGGATTATATCTTGAGACCCTATCCTCTAAAATTTTTTCCACAC  
CCAAAACAAAAAATCTCTGGGTCAAAGTCTAAAACGCTTAGGCTGGCAACCATCAGA  
TCCTTGCCCATGGTGTCTCAAGCCTACTCTCATGAAATGGACAACAGTACACGCATAT  
GGGGCCAGTTCACATATTTGGCAACCAGACCAGCATCCAGGACAACACAAAGTATGT  
TGTTTGTGTTAGAGGGCTTGGGACATTTCACTCTTTGCCAGCCTCAGCTTAATCCAGG  
AGACAAAGATTATTTTCTTATTATCTTCTGCATAGGATCTGCAATCAGAACTATTGA  
ACTTCTCCATTCAGACCGCCACTCACACCTATGGGAAAAGGGTAATGTATCATCGGCTT  
AGCAACAGGGAATACTATTCGTATGATGGAAAATGGGGACAAAAGGCTTTGGTACATA  
AAACATTATTCCTTCTTGGCCTAAAAACTCATCGCCACCTACATTAAAGCTAATATGCC  
AA

### C. US FDA approved cancer markers screened out by HPTAA database

| US FDA approved cancer biomarkers | Hptaa |
|-----------------------------------|-------|
| $\alpha$ -Fetoprotein             | YES   |
| HCG                               | YES   |
| CEA                               | YES   |
| PSA                               | YES   |
| Oestrogen receptor                | YES   |
| progesterone receptor             | YES   |
| Fibrin/FDP                        | YES   |

|                                  |    |
|----------------------------------|----|
| Epidermal growth factor receptor | NO |
| KIT                              | NO |
| Thyroglobulin                    | NO |
| Cytokeratin                      | NO |
| HER2/NEU                         | NO |

FDA approved cancer markers that can not be assigned to gene id are not included.

#### D. Clinicopathological data and experimental results of 94 bladder TCC patients.

| Id | Age | Sex | Stage | Grade | Tissue UCA1 | Urine UCA1 | NMP22 | Cytology |
|----|-----|-----|-------|-------|-------------|------------|-------|----------|
| 1  | 77  | M   | 4     | 3     | +++         | +++        | +     | +        |
| 2  | 71  | M   | 3     | 2     | +++         | +++        | +     | +        |
| 3  | 74  | M   | 2     | 3     | +++         | +++        | +     | +        |
| 4  | 54  | M   | 3     | 2     | +++         | +++        | +     | +        |
| 5  | 59  | M   | 2     | 3     | +++         | ++         | +     | +        |
| 6  | 38  | M   | 1     | 3     | ++          | +          | +     | +        |
| 7  | 75  | M   | 3     | 2     | ++          | +          | -     | -        |
| 8  | 70  | M   | 1     | 1     | NA          | -          | -     | -        |
| 9  | 61  | M   | 1     | 3     | NA          | +          | +     | +        |
| 10 | 36  | F   | 1     | 2     | NA          | +          | NA    | NA       |
| 11 | 58  | F   | 1     | 2     | NA          | -          | NA    | NA       |
| 12 | 60  | M   | 1     | 3     | +++         | +          | +     | +        |
| 13 | 70  | M   | 3     | 3     | +++         | +++        | +     | +        |
| 14 | 69  | M   | 1     | 3     | +++         | +++        | +     | +        |
| 15 | 66  | M   | 1     | 2     | NA          | +          | -     | +        |
| 16 | 68  | F   | 1     | 2     | NA          | +          | NA    | NA       |
| 17 | 61  | F   | 2     | 3     | +++         | +          | +     | +        |
| 18 | 70  | F   | 1     | 1     | NA          | +          | +     | -        |
| 19 | 72  | M   | 1     | 3     | NA          | +          | -     | +        |
| 20 | 66  | M   | 1     | 2     | NA          | -          | -     | -        |
| 21 | 62  | M   | 2     | 3     | +           | +          | +     | -        |
| 22 | 71  | M   | 1     | 2     | NA          | +          | -     | -        |
| 23 | 65  | M   | 1     | 2     | NA          | +          | NA    | NA       |
| 24 | 77  | M   | 1     | 2     | +           | +          | NA    | NA       |
| 25 | 75  | F   | 1     | 3     | NA          | +          | -     | -        |
| 26 | 63  | F   | 1     | 1     | NA          | -          | -     | -        |
| 27 | 72  | M   | 2     | 3     | ++          | +          | NA    | NA       |
| 28 | 71  | F   | 2     | 2     | -           | -          | -     | +        |
| 29 | 64  | M   | 1     | 3     | NA          | ++         | -     | +        |
| 30 | 68  | F   | 1     | 3     | NA          | ++         | -     | +        |
| 31 | 46  | M   | 1     | 2     | NA          | +          | NA    | NA       |
| 32 | 61  | F   | 1     | 2     | NA          | ++         | NA    | NA       |
| 33 | 86  | M   | 1     | 2     | NA          | -          | -     | -        |
| 34 | 72  | M   | 1     | 2     | NA          | +          | -     | +        |

|    |    |   |   |   |     |     |    |    |
|----|----|---|---|---|-----|-----|----|----|
| 35 | 70 | M | 1 | 2 | NA  | +   | NA | NA |
| 36 | 68 | M | 1 | 2 | NA  | +   | +  | +  |
| 37 | 74 | M | 1 | 2 | NA  | ++  | -  | -  |
| 38 | 66 | M | 1 | 2 | NA  | ++  | -  | NA |
| 39 | 74 | M | 1 | 1 | NA  | ++  | +  | -  |
| 40 | 59 | M | 1 | 1 | NA  | +   | +  | +  |
| 41 | 64 | M | 1 | 2 | NA  | ++  | -  | NA |
| 42 | 85 | M | 1 | 2 | NA  | ++  | NA | NA |
| 43 | 72 | M | 1 | 3 | NA  | +   | -  | -  |
| 44 | 64 | M | 1 | 2 | NA  | +   | NA | NA |
| 45 | 69 | F | 1 | 3 | NA  | ++  | +  | +  |
| 46 | 76 | M | 4 | 3 | +++ | +++ | +  | +  |
| 47 | 70 | M | 1 | 2 | NA  | ++  | -  | -  |
| 48 | 72 | M | 4 | 3 | +++ | +++ | +  | +  |
| 49 | 85 | M | 1 | 1 | NA  | +   | +  | +  |
| 50 | 58 | M | 1 | 2 | NA  | ++  | NA | NA |
| 51 | 74 | M | 1 | 2 | NA  | ++  | +  | NA |
| 52 | 63 | M | 1 | 1 | NA  | -   | -  | +  |
| 53 | 91 | M | 1 | 3 | NA  | +++ | +  | +  |
| 54 | 45 | M | 1 | 2 | NA  | +   | -  | -  |
| 55 | 59 | M | 1 | 2 | NA  | ++  | -  | NA |
| 56 | 52 | F | 1 | 2 | NA  | +   | +  | +  |
| 57 | 85 | F | 2 | 2 | ++  | +   | -  | -  |
| 58 | 78 | M | 2 | 2 | NA  | +++ | +  | +  |
| 59 | 69 | F | 1 | 1 | NA  | -   | -  | -  |
| 60 | 72 | M | 1 | 2 | NA  | +++ | +  | +  |
| 61 | 73 | M | 1 | 1 | NA  | -   | -  | -  |
| 62 | 49 | F | 1 | 1 | NA  | +   | +  | +  |
| 63 | 65 | M | 2 | 2 | +   | +   | +  | +  |
| 64 | 61 | M | 1 | 3 | NA  | -   | +  | -  |
| 65 | 25 | M | 2 | 2 | +++ | +++ | -  | +  |
| 66 | 68 | M | 1 | 1 | NA  | -   | -  | -  |
| 67 | 69 | M | 1 | 1 | -   | -   | -  | -  |
| 68 | 69 | M | 4 | 3 | NA  | +++ | NA | +  |
| 69 | 68 | M | 1 | 2 | NA  | ++  | NA | NA |
| 70 | 78 | F | 2 | 3 | +++ | +++ | +  | +  |
| 71 | 75 | M | 1 | 2 | NA  | +   | NA | NA |
| 72 | 81 | M | 1 | 1 | NA  | -   | NA | -  |
| 73 | 72 | F | 1 | 1 | NA  | ++  | NA | -  |
| 74 | 65 | M | 1 | 2 | NA  | ++  | NA | +  |
| 75 | 61 | F | 1 | 2 | NA  | +   | NA | NA |
| 76 | 57 | M | 1 | 2 | NA  | ++  | NA | NA |
| 77 | 70 | M | 2 | 3 | +   | ++  | NA | NA |
| 78 | 79 | M | 1 | 2 | NA  | +   | NA | NA |

|    |    |   |   |   |    |     |    |    |
|----|----|---|---|---|----|-----|----|----|
| 79 | 48 | M | 1 | 1 | NA | -   | NA | NA |
| 80 | 72 | M | 3 | 3 | NA | +++ | +  | +  |
| 81 | 67 | M | 1 | 2 | +  | +   | NA | +  |
| 82 | 57 | F | 2 | 2 | -  | -   | -  | -  |
| 83 | 77 | M | 3 | 2 | NA | -   | +  | +  |
| 84 | 75 | F | 2 | 2 | NA | ++  | +  | +  |
| 85 | 80 | M | 2 | 3 | NA | +++ | +  | +  |
| 86 | 83 | M | 3 | 3 | NA | +++ | -  | +  |
| 87 | 85 | M | 2 | 2 | NA | -   | +  | -  |
| 88 | 51 | M | 4 | 3 | NA | +++ | NA | +  |
| 89 | 89 | M | 3 | 3 | NA | +++ | NA | +  |
| 90 | 62 | F | 2 | 3 | NA | ++  | NA | NA |
| 91 | 72 | F | 3 | 2 | NA | ++  | -  | +  |
| 92 | 65 | F | 3 | 2 | NA | -   | -  | -  |
| 93 | 68 | F | 2 | 3 | NA | +++ | NA | NA |
| 94 | 71 | F | 3 | 3 | NA | +++ | NA | NA |

#### E. Clinicopathologic data and UCA1 expression in 46 bladder TCC tissues

| ID | Age | Gender | Stage | Grade | Multiplicity | Max Size (cm) | Tissue UCA1 |
|----|-----|--------|-------|-------|--------------|---------------|-------------|
| 1  | 77  | M      | 4     | 3     | 1            | 2.5           | +++         |
| 2  | 71  | M      | 3     | 2     | 1            | 3.5           | +++         |
| 3  | 74  | M      | 2     | 3     | 1            | 0.9           | +++         |
| 4  | 54  | M      | 3     | 2     | 1            | 7             | +++         |
| 5  | 59  | M      | 2     | 3     | 1            | 1.8           | +++         |
| 6  | 38  | M      | 1     | 3     | 1            | 1.8           | ++          |
| 7  | 75  | M      | 3     | 2     | 0            | 3.8           | ++          |
| 12 | 60  | M      | 1     | 3     | 0            | NA            | +++         |
| 13 | 70  | M      | 3     | 3     | 1            | 5.5           | +++         |
| 14 | 69  | M      | 1     | 3     | 0            | 1             | +++         |
| 17 | 61  | F      | 2     | 3     | 1            | 4.8           | +++         |
| 21 | 62  | M      | 2     | 3     | 0            | NA            | +           |
| 24 | 77  | M      | 1     | 2     | 0            | 3.5           | +           |
| 27 | 72  | M      | 2     | 3     | 1            | 11            | ++          |
| 28 | 71  | F      | 2     | 2     | 0            | NA            | -           |
| 46 | 76  | M      | 4     | 3     | 1            | 6             | +++         |
| 48 | 72  | M      | 4     | 3     | 0            | 3             | +++         |
| 57 | 85  | F      | 2     | 2     | 1            | 3.5           | ++          |
| 63 | 65  | M      | 2     | 2     | 1            | 7             | +           |
| 65 | 25  | M      | 2     | 2     | 1            | 1.5           | +++         |
| 67 | 69  | M      | 1     | 1     | 0            | NA            | -           |
| 70 | 78  | F      | 2     | 3     | 1            | 2.8           | +++         |
| 77 | 70  | M      | 2     | 3     | 1            | 3.1           | +           |
| 81 | 67  | M      | 1     | 2     | 0            | NA            | +           |

|      |    |   |   |   |   |     |     |
|------|----|---|---|---|---|-----|-----|
| 82   | 57 | f | 2 | 2 | 0 | NA  | -   |
| B1   | 75 | M | 1 | 2 | 1 | NA  | +++ |
| B2   | 53 | M | 2 | 3 | 0 | 2.5 | +++ |
| B3   | 75 | M | 4 | 3 | 1 | NA  | -   |
| B4   | 28 | M | 4 | 3 | 1 | 4   | +++ |
| B5   | 49 | M | 2 | 2 | 1 | 2   | +++ |
| B6   | 75 | M | 4 | 3 | 1 | 3.5 | ++  |
| B7   | 35 | F | 3 | 3 | 0 | 3.5 | ++  |
| B8   | 62 | M | 2 | 3 | 1 | NA  | -   |
| DU02 | 48 | M | 4 | 2 | 1 | 5.5 | +++ |
| DU06 | 61 | F | 3 | 3 | 1 | 6.5 | -   |
| DU15 | 69 | M | 3 | 3 | 0 | 4   | +++ |
| DU16 | 27 | F | 1 | 3 | 0 | 3   | +   |
| DU18 | 81 | M | 4 | 3 | 1 | 2   | +   |
| DU34 |    |   | 3 | 3 | 1 | 6.5 | +++ |
| DU44 | 46 | M | 3 | 3 | 1 | 3.5 | +++ |
| z1   | 70 | m | 1 | 2 | 0 | NA  | +   |
| z2   | 73 | m | 1 | 2 | 0 | NA  | -   |
| z3   | 61 | m | 3 | 3 | 1 | 4.5 | ++  |
| z4   | 65 | m | 2 | 3 | 1 | 3   | ++  |
| z5   | 77 | m | 4 | 3 | 1 | 2   | +++ |
| z6   | 69 | f | 1 | 3 | 0 | 6   | +   |

#### F. Detailed information of 18 bladder tumor markers that have been analyzed.

| GeneSym | U133 Probe  | GeneID | Gene Name                             | PMID*    |
|---------|-------------|--------|---------------------------------------|----------|
| BIRC5   | 202095_s_at | 332    | Survivin                              | 14713774 |
| CALR    | 200935_at   | 811    | calreticulin                          | 14764641 |
| CFH     | 213800_at   | 3075   | factor H                              | 15774575 |
| CFHL1   | 206910_x_at | 3078   | complement factor H-related protein 1 | 15774575 |
| DLG7    | 203764_at   | 9787   | HURP                                  | 12100959 |
| ELK1    | 203617_x_at | 2002   | BLCA-4                                | 16360453 |
| HYAL1   | 210619_s_at | 3373   | Hyaluronoglucosaminidase 1            | 9044860  |
| HYAL2   | 206855_s_at | 8692   | Hyaluronoglucosaminidase 2            | 9044860  |
| HYAL3   | 211728_s_at | 8372   | N-acetyltransferase 6                 | 9044860  |
| HYAL4   | 220249_at   | 23553  | Hyaluronoglucosaminidase 4            | 9044860  |
| KRT20   | 213953_at   | 54474  | Keratin 20                            | 9817302  |
| MMP9    | 203936_s_at | 4318   | Matrix metalloproteinase-9            | 9865914  |
| MUC7    | 216359_at   | 4589   | Mucin 7                               | 12837463 |
| PLAU    | 205479_s_at | 5328   | Urokinase Plasminogen Activator (uPA) | 12736046 |
| PLAUR   | 211924_s_at | 5329   | uPA receptor (uPAR),                  | 12736046 |
| PSCA    | 205319_at   | 8000   | Prostate stem cell antigen            | 12771726 |
| TERT    | 207199_at   | 7015   | Telomerase                            | 12893365 |
| UCA1    | 227919_at   |        | Urothelial Carcinoma associated 1     | -        |

---

\*Note: PMID: Pubmed ID of related literatures.
